# X-Chromosome Inactivation Patterns and Androgen Receptor Functionality Influence Phenotype and Social Characteristics as Well as Pharmacogenetics of Testosterone Therapy in Klinefelter Patients

MICHAEL ZITZMANN, MARION DEPENBUSCH, JÖRG GROMOLL, AND EBERHARD NIESCHLAG

*Institute of Reproductive Medicine, University of Munster, D-48129 Munster, Germany*

Klinefelter syndrome is characterized by a vast range of phenotypes related to androgen effects. Testosterone (T) acts via the X-linked androgen receptor gene carrying the CAG repeat (CAGn) polymorphism, the length of which is inversely associated with androgen action and might account for the marked variation in phenotypes. In 77 newly diagnosed and untreated Klinefelter patients with a 47,XXY karyotype we assessed phenotype and social traits in relation to X-weighted biallelic CAGn length using X-chromosome inactivation analysis after digestion of leukocyte DNA with methylation-sensitive *HpaII*. Forty-eight men were hypogonadal and received T substitution therapy; in these, pharmacogenetic effects were investigated. The shorter CAGn allele was preferentially inactive. CAGn length was positively associated with body height. Bone density and the relation of arm span to body height were inversely related to CAGn length. The

presence of long CAGn was predictive for gynecomastia and smaller testes, whereas short CAGn were associated with a stable partnership and professions requiring higher standards of education also when corrected for family background. There was a trend for men with longer CAGn to be diagnosed earlier in life. Under T substitution, men with shorter CAGn exhibited a more profound suppression of LH levels, augmented prostate growth, and higher hemoglobin concentrations. A significant genotype-phenotype association exists in Klinefelter patients: androgen effects on appearance and social characteristics are modulated by the androgen receptor CAGn polymorphism. The effects of T substitution are pharmacogenetically modified. This finding is magnified by preferential inactivation of the more functional short CAGn allele. (*J Clin Endocrinol Metab* 89: 6208–6217, 2004)

**K**LINFELTER SYNDROME, THE most frequent form of male hypogonadism, is an endocrine disorder based on sex chromosome aneuploidy. Descriptions of the clinical picture include small testes, hypogonadism, gynecomastia, and elevated concentrations of gonadotropins, whereas testosterone (T) levels tend to be low (1–5). A marked variation in neurological and cognitive perturbations (language/behavioral problems) exists as well as shifts in body proportions and androgen deficiency-related problems (loss or initial absence of libido, decreased muscle strength, osteoporosis, and anemia) (2–4, 6).

Klinefelter syndrome has a prevalence of 0.1–0.2% within the male population (4, 6). Eighty percent of cases are due to a 47,XXY karyotype; the others relate to higher grade aneuploidies or mosaicism (2, 5, 6). Although Klinefelter syndrome is not rare, many patients escape diagnosis. Only 10% are detected before or during puberty, and about two thirds of all men with X-chromosome polyploidies fail to be identified during their lifetime (6, 7).

It remains unresolved why so many Klinefelter patients are not diagnosed, and it must be speculated that the clinical picture we observe is a biased one, showing only the extreme

cases, whereas those men with more unobtrusive phenotypes lead normal lives. Nevertheless, because spermatogenesis is affected by meiotic problems in all Klinefelter patients, they may be detected at fertility centers (8).

Recently, the NIH sponsored a meeting on the topic of variations in Klinefelter phenotypes; new research directions were identified, especially the roles of androgens and the X-linked androgen receptor (AR) (4).

Differences in the AR sequence are characterized mostly by a highly polymorphic trinucleotide repeat (CAGn) in exon 1 (9), the normal length of which is 9–37 (10); expanded numbers are observed in the neurological disorder of X-linked spinobulbar muscular atrophy (X-SBMA) (11). *In vitro*, the T-induced transactivation activity of the AR is inversely associated with the length of CAGn due to reduced binding of AR coactivators (12), and accordingly, marked features of hypogonadism are noticed in X-SBMA (13, 14).

Also, in healthy men with repeat numbers within the normal range, there are numerous reports on how the CAGn polymorphism modulates physiological androgen effects (reviewed in Ref. 10). Various targets are affected in eugonadal men: prostate size (15); concentrations of lipids, insulin, and leptin (16); endothelial functions (17); bone density (18, 19); mood/cognition (20, 21); and sperm concentrations (22). The risk for prostate cancer is increased in men with shorter repeats (23), and a pharmacogenetic implication for prostate growth during androgen substitution of hypogonadal men has been described (24).

Abbreviations: AR, Androgen receptor; DF, degree of freedom; SS, sum of squares; T, testosterone; X-SBMA, X-linked spinobulbar muscular atrophy.

JCEM is published monthly by The Endocrine Society (<http://www.endo-society.org>), the foremost professional society serving the endocrine community.

In Klinefelter patients, the case is complicated by the presence of at least two AR alleles undergoing the phenomenon of X inactivation; one gene in every cell becomes inactive (25). In general, this process takes place in cells containing more than one X-chromosome. It is facilitated by methylation of specific genes on the X-chromosome; a methylated gene cannot be transcribed and, as a consequence, cannot be translated into a protein. Hence, one of the AR alleles is methylated and inactive; the other AR allele is not methylated and active. Inactivation is believed to be random on a cell to cell basis (25). Nevertheless, in certain pathological environments in women, nonrandom inactivation of AR alleles can occur; it has been described in conditions related to increased androgen activity (hirsutism and polycystic ovaries) (26–28). In contrast to normal men, Klinefelter patients have two AR alleles, as do women. It can be speculated, that nonrandom inactivation of AR alleles may take place in this condition. Correspondingly, a study of 17 men with 47,XXY demonstrated skewed inactivation, but provided no information on CAGn length or phenotypes (29).

The present study analyses phenotype and clinical traits in newly diagnosed and untreated Klinefelter patients with a 47,XXY karyotype in regard to the putative influence of X-chromosome inactivation and AR CAGn length. It also investigates pharmacogenetic effects occurring under T substitution. The study concerns Klinefelter patients with endocrine disturbances or those with infertility who were previously undetected. The range of Klinefelter phenotypes was unusually broad, because patients presented at an andrology unit treating both endocrine and infertility patients; they were examined identically by the same physicians within the same setting.

## Subjects and Methods

### Patients

Among 244 Klinefelter patients of a total of 15,600 patients, 77 men (age, 18–65 yr at diagnosis) fulfilled the inclusion criteria for entry into a retrospective data analysis: Caucasian origin, nonmosaic 47,XXY karyotype, and no previous exposure to exogenous androgens. They were referred because of endocrine disorders suspected by external physicians ( $n = 45$ ) or unwanted childlessness ( $n = 32$ ). The patients' histories were obtained during a standardized interview. Body hair pattern was categorized according to a four-degree scale (feminine, scanty male, normally male, or extraordinarily male) by experienced clinicians. The social status of patients and family members was assessed in terms of profession and partnership. All men gave written informed consent for diagnostics, treatment, and the use of genomic material for scientific evaluation (approved by the ethics committee of the medical faculty and the State Medical Board). Of the 50 patients who were hypogonadal (total T,  $<12$  nmol/liter; see *Results*), 48 men agreed to receive T substitution by either every 2-wk im injections of T enanthate (250 mg;  $n = 40$ ) or daily nonscrotal patches (two patches, 2.5 mg T each;  $n = 8$ ). In these 48 men, a pharmacogenetic evaluation was performed of prostate volume during treatment (assessments after  $2.1 \pm 0.4$  yr). Also determined was the suppression of LH levels during T treatment, and data refer to suppression maximally achieved during that time period.

### Ultrasound examinations, semen analysis, and hormone measurements

Determination of testicular and prostate volumes, assessment of bone density by phalangeal ultrasound as amplitude-dependent speed of sound (meters per second), and semen analysis were performed using

established procedures (5, 18, 24, 30, 31). Determination of hormones followed methods previously described (17). Whole EDTA-blood for subsequent DNA analysis was stored continuously at  $-20$  C.

All blood sampling was performed between 0800–1200 h. To test for effective T substitution, samples from patients being treated with im injected T enanthate were obtained at time points indicating individual average levels, preferentially in the second week after injection. Patients treated with the transdermal scrotal T system were sampled 2–5 h after administration of the patch.

### Chromosome analysis

Karyotyping of metaphase peripheral blood lymphocytes according to standard methods at the Institute of Human Genetics, University of Munster.

### Determination of CAGn length

DNA was isolated from EDTA blood samples using the Nucleon Kit (Amersham Biosciences Freiburg, Germany), and analysis of the AR gene microsatellite residues was performed as previously published (17). Patients with two detected bands of CAGn length were considered heterozygous and subjected to X-chromosome inactivation analysis.

### X-Chromosome inactivation analysis

Analysis using leukocyte DNA from heterozygous patients was performed as previously described (27, 29). The methylation status of AR alleles, hence inactivation, was assessed using the methylation-sensitive restriction enzyme *HpaII* (Roche Diagnostic Systems, Mannheim, Germany). Nonmethylated, hence active, DNA segments are digested by the enzyme and are unavailable for PCR amplification, whereas the methylated sites are not digested, remain intact, and thus provide substrate for amplification.

Equivalent 100-ng DNA aliquots were either digested with 10 U *HpaII* or mock-digested in respective buffer containing no enzyme. Samples were digested overnight at 37 C in a 30- $\mu$ l reaction volume, followed by a final enzyme denaturation step at 95 C for 5 min. Aliquots of 5  $\mu$ l were amplified by PCR and run on an LI-COR sequencer (Biosciences, Bad Homburg, Germany). From every fifth blood sample, DNA was again isolated, and the methylation status was reanalyzed to assure the reproducibility of the methods being used (interassay coefficient of variation, 7.3%). Total fluorescent peak areas for both alleles in digested and undigested samples were calculated by ChemImages software (Biozym, Oldesdorf, Germany). The total fluorescent peak areas for both alleles in digested and undigested samples were recorded and used for the following calculations of allele inactivation. The variables were signal allele 1 digested ( $a$ ), signal allele 2 digested ( $b$ ), signal allele 1 undigested ( $c$ ), and signal allele 2 undigested ( $d$ ). In an ideal case,  $c$  should equal  $d$ , which, in practice, is rarely the case. To compensate for unequal amplification of alleles due to confounding factors not caused by methylation, signals  $c$  and  $d$  (undigested samples) are necessary to create a correction factor: inactivation of allele 1 =  $(a/c)/(a/c + b/d)$  (equation I) and inactivation of allele 2 =  $(b/d)/(a/c + b/d)$  (equation II). Equations 1 and 2 were used throughout this study. An inactivation value of 0 equals no inactivation, 1 would be complete inactivation, and 0.5 is random inactivation. Inactivation values of alleles 1 and 2 always sum up to 1 (equation I + equation II = 1, normalization). Equations I and II have been used in a previously published study (29). Hence, in the case of  $c = d$ , no presence of a confounder of amplification, the equations equal to: equation I = equation III [inactivation of allele 1 =  $a/(a + b)$ ] and equation II = equation IV [inactivation of allele 2 =  $b/(a + b)$ ].

To calculate the physiologically active means of CAGn, the method previously described (27) was used. Each CAGn allele length in a genotypic pair was multiplied by its total expression (1 minus inactivity) and the two adjusted CAGn values were then added to obtain the X-weighted biallelic mean, which can differ markedly from the arithmetic mean in the case of skewed inactivation. For homozygous patients, simple CAGn length was used for additional analysis.

### Statistical evaluation

Associations between continuous parameters and CAGn length were calculated (Spearman's rank correlation). Other associations were in-

**TABLE 1.** General data of 77 untreated Klinefelter patients (nonmosaic 47,XXY)

| Parameter                                                          | Unit              | Value (range, mean $\pm$ SD) | No data |
|--------------------------------------------------------------------|-------------------|------------------------------|---------|
| <b>Anthropometrical data</b>                                       |                   |                              |         |
| Age at diagnosis                                                   | yr                | 18–65, 29.4 $\pm$ 8.5        |         |
| Age of mother at birth                                             | yr                | 17–45, 28.1 $\pm$ 6.1        | n = 3   |
| Age of father at birth                                             | yr                | 17–50, 31.4 $\pm$ 7.4        | n = 4   |
| BMI                                                                | kg/m <sup>2</sup> | 15.9–36.4, 24.6 $\pm$ 4.4    |         |
| Body height                                                        | cm                | 169–201, 184.9 $\pm$ 7.5     |         |
| Body weight                                                        | kg                | 50.0–130.0, 83.9 $\pm$ 16.3  |         |
| Arm span                                                           | cm                | 165–200, 184.5 $\pm$ 7.7     | n = 5   |
| Ratio arm span/height                                              |                   | 0.95–1.08, 0.99 $\pm$ 0.02   | n = 5   |
| <b>Sociometrical data</b>                                          |                   |                              |         |
| Partnership                                                        | n                 | Yes: 43 No: 34               |         |
| Profession                                                         |                   |                              |         |
| Unskilled worker                                                   | n                 | 26                           |         |
| Craftsman                                                          | n                 | 41                           |         |
| University education                                               | n                 | 10                           |         |
| Reason for referral                                                |                   |                              |         |
| Fertility problems                                                 | n                 | 34                           |         |
| Endocrine diagnostics                                              | n                 | 43                           |         |
| <b>Hormone levels</b>                                              |                   |                              |         |
| Total T                                                            | nmol/liter        | 1.3–25.9, 10.5 $\pm$ 5.3     |         |
| SHBG                                                               | nmol/liter        | 13.0–82.0, 38.5 $\pm$ 17.5   | n = 4   |
| Free T                                                             | pmol/liter        | 29–592, 212 $\pm$ 118        | n = 4   |
| Estradiol                                                          | pmol/liter        | 20.3–139, 51.3 $\pm$ 22.5    | n = 1   |
| LH                                                                 | U/liter           | 8.5–40.0, 19.2 $\pm$ 6.1     | n = 2   |
| FSH                                                                | U/liter           | 11.1–81.0, 34.3 $\pm$ 13.4   | n = 2   |
| Prostate-specific antigen                                          |                   | 0.2–3.9, 0.6 $\pm$ 0.5       | n = 6   |
| <b>AR alleles</b>                                                  |                   |                              |         |
| Homozygous                                                         | n                 | 31                           |         |
| CAGn length                                                        | n                 | 15–28, 21.4 $\pm$ 2.9        |         |
| Heterozygous                                                       | n                 | 46                           |         |
| CAGn length short allele                                           | n                 | 12–24, 19.4 $\pm$ 2.1        |         |
| CAGn length long allele                                            | n                 | 18–30, 23.2 $\pm$ 2.6        |         |
| Arithmetic mean                                                    |                   | 17.5–25.0, 21.2 $\pm$ 1.9    |         |
| Inactivation short allele                                          |                   | 0.20–0.88, 0.59 $\pm$ 0.15   |         |
| Inactivation long allele                                           |                   | 0.11–0.79, 0.41 $\pm$ 0.15   |         |
| X-weighted biallelic mean                                          |                   | 16.8–26.5, 21.8 $\pm$ 2.1    |         |
| All patients                                                       |                   | 15.0–28.0, 21.6 $\pm$ 2.5    |         |
| X-weighted biallelic mean                                          |                   |                              |         |
| <b>Clinical data</b>                                               |                   |                              |         |
| Gynecomastia                                                       | n                 | Yes: 39 No: 38               |         |
| Body hair pattern                                                  |                   |                              | n = 1   |
| Feminine                                                           | n                 | 10                           |         |
| Scantly male                                                       | n                 | 50                           |         |
| Normally male                                                      | n                 | 13                           |         |
| Extraordinarily male                                               | n                 | 3                            |         |
| Bitesticular volume                                                | ml                | 0.9–14.7, 5.5 $\pm$ 2.6      | n = 2   |
| Prostate volume                                                    | ml                | 5.0–30.0, 14.5 $\pm$ 4.7     | n = 5   |
| Azoospermia                                                        | n                 | Yes: 54 No: 1                | n = 22  |
| Hematocrit                                                         | %                 | 0.36–0.51, 0.44 $\pm$ 0.32   | n = 3   |
| Hemoglobin                                                         | g/liter           | 120–169, 146 $\pm$ 10.3      | n = 3   |
| Bone density                                                       | m/sec             | 1790–2172, 2071 $\pm$ 72.4   | n = 9   |
| <b>Data from the 48 T-treated hypogonadal Klinefelter patients</b> |                   |                              |         |
| CAGn length                                                        | n                 | 15.0–28.0, 21.2 $\pm$ 3.1    |         |
| X-weighted biallelic mean                                          |                   |                              |         |
| Total T baseline                                                   | nmol/liter        | 1.3–11.0, 6.6 $\pm$ 2.2      |         |
| Total T under treatment                                            | nmol/liter        | 12.1–33.1, 18.9 $\pm$ 5.5    |         |
| LH baseline                                                        | U/liter           | 8.5–31.8, 19.0 $\pm$ 5.0     |         |
| LH maximally suppressed                                            | U/liter           | 0.2–7.7, 2.1 $\pm$ 1.9       |         |
| Prostate volume baseline                                           | ml                | 5–28, 14.3 $\pm$ 5.1         |         |
| Prostate volume under treatment                                    | ml                | 10–45, 21.6 $\pm$ 6.4        |         |
| Hemoglobin baseline                                                | g/liter           | 120–169, 142 $\pm$ 12        |         |
| Hemoglobin under treatment                                         | g/liter           | 130–181, 154 $\pm$ 12        |         |

BMI, Body mass index.

investigated and adjusted for potentially confounding variables using linear regression models (see Table 3) for the association of CAGn allele length with the respective continuous parameter and stepwise binomial logistic regression models for association with dichotomous variables.

To this end, all variables were checked for normal distribution by the Kolmogorov-Smirnov one-sample test for goodness of fit and were log-transformed if necessary.

In the regression models (see Table 3) various putative predictors

were included in backward stepwise multiple linear regression analyses according to the clinical plausibility of possible influence on a clinical feature (called the variable in this report). Those putative predictors that did not contribute to the regression model were excluded (exclusion threshold,  $P > 0.10$ ), but those predictors that significantly influenced the clinical feature are given with the standard coefficient  $\beta$  and the respective  $P$  value. In this approach, the estradiol/T ratio was not used, but, rather, total T and estradiol concentrations as raw values standing on their own were used to discriminate the activity of each substance.

Contingency tables of categorical variables (gynecomastia, partnership, reason for referral, and profession) were created according to tertiles of X-weighted biallelic CAGn length (see Fig. 3). The professions of fathers and brothers were categorized accordingly, and differences from the patient category were expressed as the score (see Fig. 3 for details).

For a comparison between a linear and a nonlinear association of T levels with hemoglobin concentrations, the goodness of fit of both regression models was quantified by the sum of squares. The F ratio quantifies the relationship between the relative increase in sum of squares (SS) and the relative increase in degrees of freedom (DF) between two models, here a linear (1) and a nonlinear (2) association:  $F = [(SS1 - SS2)/SS2]/[(DF1 - DF2)/DF2]$ . If the linear model is correct, one would expect an F ratio near 1.0. If the ratio is much greater than 1.0, there are two possibilities: the nonlinear model is correct, or the linear model is correct, but random scatter lets the more complicated model fit better. The  $P$  value yielded by the F test will show how rare the latter

coincidence would be. Thus,  $P < 0.05$  can be considered a significant confirmation of the nonlinear model.

Computations were performed using the statistical software package SPSS (Chicago, IL; release 11.0) and PRISM (GraphPad, Inc., San Diego, CA; release 3.2).

## Results

Anthropomorphic and clinical data are shown in Table 1; basic correlations to allele length are given in Table 2. There was a trend for men with shorter repeats to be diagnosed later in life (Table 2). Fifty of 77 patients (65%) were hypogonadal (T,  $<12$  nmol/liter).

Forty-six of 77 investigated Klinefelter patients exhibited a heterozygous genotype of AR alleles; 31 men were homozygous. In the heterozygous patients, nonrandom inactivation of AR alleles was found; the average inactivations of the short and long alleles were  $0.59 \pm 0.15$  and  $0.41 \pm 0.15$ , respectively (0 = no inactivation; 1 = complete inactivation). Testing inactivation against random was significant (Fig. 1A). The X-weighted biallelic mean and the arithmetic mean of both CAGn residues were significantly different (Fig. 1B).

**TABLE 2.** Basic correlations

| Parameter                                                              | Basic correlations with the X-weighted biallelic mean of CAG repeats in the AR gene |                  | Basic correlations with the $E_2/T$ ratio |              |
|------------------------------------------------------------------------|-------------------------------------------------------------------------------------|------------------|-------------------------------------------|--------------|
|                                                                        | Spearman's $r_s$                                                                    | $P$              | Spearman's $r_s$                          | $P$          |
| <b>Anthropometrical data</b>                                           |                                                                                     |                  |                                           |              |
| Age at diagnosis                                                       | <b>-0.19</b>                                                                        | <b>0.07</b>      | <b>-0.18</b>                              | <b>0.08</b>  |
| Age of mother at birth                                                 | -0.05                                                                               | 0.67             | -0.12                                     | 0.35         |
| Age of father at birth                                                 | -0.13                                                                               | 0.32             | -0.14                                     | 0.29         |
| BMI                                                                    | 0.02                                                                                | 0.90             | <b>0.29</b>                               | <b>0.007</b> |
| Body height                                                            | <b>0.46</b>                                                                         | <b>&lt;0.001</b> | 0.12                                      | 0.28         |
| Body weight                                                            | 0.12                                                                                | 0.37             | <b>0.33</b>                               | <b>0.002</b> |
| Arm span                                                               | <b>0.26</b>                                                                         | <b>0.02</b>      | 0.13                                      | 0.29         |
| Ratio arm span/height                                                  | <b>-0.37</b>                                                                        | <b>0.001</b>     | -0.03                                     | 0.81         |
| <b>Hormone levels</b>                                                  |                                                                                     |                  |                                           |              |
| Total T                                                                | 0.10                                                                                | 0.37             |                                           |              |
| SHBG                                                                   | -0.09                                                                               | 0.47             | -0.10                                     | 0.39         |
| Free T                                                                 | 0.12                                                                                | 0.33             |                                           |              |
| Estradiol                                                              | 0.11                                                                                | 0.32             |                                           |              |
| LH                                                                     | -0.07                                                                               | 0.56             | -0.04                                     | 0.71         |
| FSH                                                                    | -0.05                                                                               | 0.68             | <b>-0.26</b>                              | <b>0.02</b>  |
| Prostate-specific antigen                                              | 0.02                                                                                | 0.90             | 0.02                                      | 0.89         |
| <b>Clinical data</b>                                                   |                                                                                     |                  |                                           |              |
| Body hair pattern                                                      | 0.04                                                                                | 0.63             | <b>-0.31</b>                              | <b>0.006</b> |
| Bitesticular volume                                                    | <b>-0.24</b>                                                                        | <b>0.04</b>      | -0.14                                     | 0.22         |
| Prostate volume                                                        | 0.03                                                                                | 0.89             | -0.16                                     | 0.19         |
| Hematocrit                                                             | -0.08                                                                               | 0.49             | <b>-0.26</b>                              | <b>0.02</b>  |
| Hemoglobin                                                             | -0.08                                                                               | 0.49             | <b>-0.27</b>                              | <b>0.02</b>  |
| Bone density                                                           | <b>-0.36</b>                                                                        | <b>0.003</b>     | <b>-0.33</b>                              | <b>0.007</b> |
| <b>Pharmacogenetic data from the 48 T-treated hypogonadal patients</b> |                                                                                     |                  |                                           |              |
| Total T baseline                                                       | -0.03                                                                               | 0.85             |                                           |              |
| Total T under treatment                                                | 0.02                                                                                | 0.91             |                                           |              |
| LH baseline                                                            | -0.16                                                                               | 0.28             | -0.03                                     | 0.74         |
| LH maximally suppressed                                                | <b>0.39</b>                                                                         | <b>0.005</b>     | 0.12                                      | 0.35         |
| Prostate volume baseline                                               | -0.17                                                                               | 0.46             | -0.17                                     | 0.25         |
| Prostate volume under treatment                                        | <b>-0.34</b>                                                                        | 0.02             | <b>-0.25</b>                              | <b>0.09</b>  |
| Hemoglobin baseline                                                    | 0.17                                                                                | 0.24             | <b>-0.33</b>                              | <b>0.03</b>  |
| Hemoglobin under treatment                                             | <b>-0.36</b>                                                                        | <b>0.009</b>     | <b>-0.25</b>                              | <b>0.08</b>  |

Basic correlations according to Spearman's rank correlation test of continuous parameters (clinical features) to the X-weighted biallelic CAGn length or the estradiol ( $E_2$ )/testosterone (T) ratio: two-sided  $P < 0.05$  was considered significant, and results are given in **bold** numbers; a trend ( $0.05 < P < 0.10$ ) is given in *italics*. For the significant associations of CAGn length or  $E_2/T$  ratio to partnership, profession, gynecomastia, and reason for referral see *Results* and Fig. 3. BMI, Body mass index.

FIG. 1. A, Inactivation patterns of short and long AR alleles in heterozygous Klinefelter patients ( $n = 46$ ). There was a significant difference from random (Wilcoxon's signed rank test,  $P < 0.001$ ). End to end line, Random inactivation. B, The difference of the X-weighted biallelic mean and the arithmetic mean of CAGn length of the AR gene in heterozygous Klinefelter patients ( $n = 46$ ). Example:  $\triangle$ , short allele;  $\square$ , long allele;  $\diamond$ , arithmetic mean;  $\bullet$ , X-weighted biallelic mean; numbers indicate CAGn length. In this case, the difference would be 2. Overall, this difference was significantly different from zero, the X-weighted biallelic mean was longer than the arithmetic mean in most cases (by Wilcoxon signed rank test,  $P < 0.001$ ).

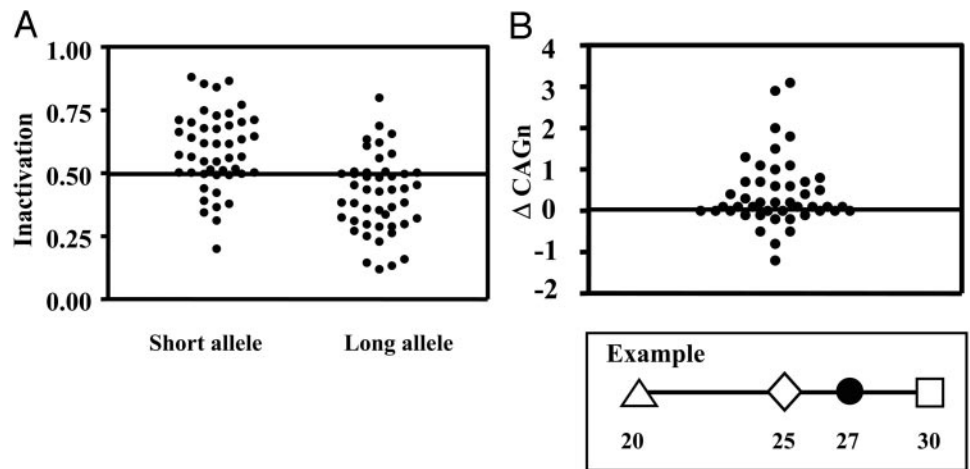

For additional analyses in all Klinefelter patients, CAGn length was used as combined data from X-weighted biallelic mean in heterozygous men and simple CAGn length in homozygous men.

Multiple regression models (Table 3) confirmed the basic associations (Table 2) of body height and the ratio of arm span/body height to CAGn length. For example, the average height of men with short CAGn ( $180.7 \pm 6.4$  cm) differed markedly from the height of men with long CAGn ( $189.4 \pm 7.3$  cm; Fig. 2A, *inset*). Bone density was also lower in men with longer CAGn (Tables 2 and 3). The estradiol/T ratio was mostly related to different clinical parameters than was CAGn length, such as body mass index and hair pattern (Table 2).

Gynecomastia was found significantly more often in patients with longer CAGn (Fig. 3A). This was confirmed by binomial logistic regression; long CAGn was a predictor ( $P = 0.009$ ) as were low T levels ( $P = 0.005$ ), high estradiol concentrations ( $P = 0.02$ ), and high body mass index ( $P = 0.06$ ). The results were corroborated when the estradiol/T ratio was incorporated in the regression model (CAGn,  $P = 0.01$ ; estradiol/T ratio,  $P < 0.001$ ). Men with shorter CAGn were significantly more likely to live within a stable relationship and seek advice for reasons of childlessness than other patients (Fig. 3, B and C), whereas the estradiol/T ratio was not related to these parameters.

Klinefelter patients with shorter CAGn were more often employed in professions requiring a higher level of education. This was corroborated when correcting for professions of family members, hence background education and environment; patients with short CAGn tended to maintain the family status compared with fathers or brothers, whereas a deterioration of educational levels was mostly and significantly observed in those with longer CAGn (Fig. 3D). The estradiol/T ratio was not related to professional status.

The other parameters were, with 65% of the patients being hypogonadal and, hence, without current sufficiency of AR activation, not dependent on genomically determined androgen activity. Respective associations in multiple regression models are shown in Table 3. Within this mixed cohort of hypogonadal and eugonadal Klinefelter patients, hemo-

globin concentrations were dependent on T levels in a log-linear manner, a regression model superior to a linear association (by F test,  $P < 0.01$ ; Fig. 4A).

Among the 55 patients who donated a semen sample, all except one were azoospermic. In the respective patient, less than 0.1 million sperm/ml were found. This 35-yr-old carpenter had a bitesticular volume of 7.2 ml, eugonadal total T concentrations of 13.5 nmol/liter, and was heterozygous for AR alleles (20 and 24 CAGn). He was one of the few patients in whom the shorter allele was preferably active (X-weighted biallelic mean, 21.2; arithmetic mean, 22; see Fig. 1B).

The age of parents at birth was not related to any parameter, neither homozygosity nor heterozygosity of patients.

#### Pharmacogenetic data

In cross-sectional analyses of data before and under treatment in the 48 treated men, baseline concentrations of LH and hemoglobin as well as prostate size were not related to CAGn length. When T levels were elevated by substitution therapy, suppression of LH concentrations, elevation of hemoglobin concentrations, and prostate growth were strongly related to the AR polymorphism (Tables 2 and 3 and Fig. 4, B and C).

These approaches are confirmed by analysis of covariance for repeated measurements using age, changes in T levels, and CAGn length as covariables. In this model, suppression of LH concentrations was positively influenced by the degree of T increment during therapy ( $P = 0.04$ ) and was inversely associated with CAGn length ( $P = 0.009$ ). Also, prostate growth during therapy was inversely influenced by CAGn length ( $P = 0.004$ ), whereas higher age ( $P = 0.06$ ) and more pronounced increment in T levels during substitution ( $P = 0.05$ ) were positively related to prostate volume. Initial prostate size was included as a confounder in this longitudinal model as well; it influenced the outcome (prostate size under therapy) significantly ( $P < 0.001$ ). The effect of T treatment on hemoglobin concentrations was more pronounced in men with

**TABLE 3.** Backward stepwise multiple linear regression models

| Variable                                                        | Unit              | Predictor               | Standard coefficient ( $\beta$ ) | <i>P</i>         | Excluded                     |
|-----------------------------------------------------------------|-------------------|-------------------------|----------------------------------|------------------|------------------------------|
| Body height                                                     | cm                | CAGn                    | <b>0.47</b>                      | <b>&lt;0.001</b> | TT, log age, estradiol       |
| Relation of arm span to body height                             |                   | CAGn                    | <b>-0.39</b>                     | <b>0.001</b>     | TT, log age, estradiol       |
| Log bitesticular volume                                         | ml                | CAGn                    | <b>-0.26</b>                     | <b>0.02</b>      | Log age, height              |
| BMI                                                             | kg/m <sup>2</sup> | TT                      | -0.43                            | 0.01             | CAGn                         |
|                                                                 |                   | Estradiol               | 0.45                             | 0.01             |                              |
|                                                                 |                   | Log age                 | 0.20                             | 0.05             |                              |
| Body hair pattern                                               | TT                | Body height             | 0.26                             | 0.03             | CAGn, log age, estradiol     |
|                                                                 |                   |                         | -0.32                            | 0.02             |                              |
| LH                                                              | U/liter           | Bitesticular volume     | -0.47                            | <0.001           | CAGn, log age, TT, estradiol |
|                                                                 |                   | BMI                     | -0.33                            | 0.002            |                              |
| FSH                                                             | U/liter           | Bitesticular volume     | -0.29                            | 0.006            | CAGn, log age, TT, estradiol |
|                                                                 |                   | BMI                     | -0.45                            | <0.001           |                              |
| TT                                                              | nmol/liter        | Log age                 | -0.23                            | 0.04             | CAGn, BMI, LH                |
|                                                                 |                   | Bitesticular volume     | 0.24                             | 0.03             |                              |
| SHBG                                                            | nmol/liter        | BMI                     | -0.37                            | 0.002            | CAGn, estradiol              |
|                                                                 |                   | Log age                 | 0.23                             | 0.04             |                              |
| Log free T                                                      | pmol/liter        | Log age                 | -0.36                            | 0.003            | CAGn, BMI                    |
| Prostate volume                                                 | ml                | TT                      | 0.27                             | 0.02             | CAGn, estradiol              |
|                                                                 |                   | Log age                 | 0.25                             | 0.03             |                              |
| Hemoglobin                                                      | mg/dl             | TT                      | 0.36                             | 0.002            | CAGn, log age, estradiol     |
| Arcsin hematocrit                                               | %                 | TT                      | 0.33                             | 0.004            | CAGn, log age, estradiol     |
| Bone density                                                    | m/sec             | CAGn                    | <b>-0.34</b>                     | <b>0.003</b>     | Log age, estradiol, BMI      |
|                                                                 |                   | TT                      | <b>0.32</b>                      | <b>0.005</b>     |                              |
| Pharmacogenetic data from the 48 T-treated hypogonadal patients |                   |                         |                                  |                  |                              |
| Prostate volume under treatment                                 | ml                | CAGn                    | <b>-0.34</b>                     | 0.002            | Estradiol                    |
|                                                                 |                   | Log age                 | <b>0.18</b>                      | <b>0.08</b>      |                              |
|                                                                 |                   | TT under treatment      | <b>0.21</b>                      | <b>0.07</b>      |                              |
|                                                                 |                   | Initial prostate volume | <b>0.49</b>                      | <b>&lt;0.001</b> |                              |
| Log LH max. suppressed                                          | U/liter           | CAGn                    | <b>0.39</b>                      | <b>0.005</b>     | Log age, estradiol           |
|                                                                 |                   | TT under treatment      | <b>-0.25</b>                     | <b>0.07</b>      |                              |
| Hemoglobin under treatment                                      | mg/dl             | CAGn                    | <b>-0.41</b>                     | <b>0.001</b>     | Log age, estradiol           |
|                                                                 |                   | TT under treatment      | <b>0.34</b>                      | <b>0.01</b>      |                              |

*Bold numbers* indicate significant involvement of the AR polymorphisms. BMI, Body mass index.

shorter CAGn ( $P = 0.003$ ) and higher increases in T levels ( $P = 0.02$ ).

### Discussion

This study presents novel information concerning the unresolved variety of phenotypes in Klinefelter patients. In a cohort comprising a broad range of Klinefelter phenotypes, analysis of the CAGn polymorphism of the AR gene in combination with X-chromosome inactivation demonstrated that a modulation of morphological traits as well as social aspects is exerted via this genomically determined entity.

In contrast to women, of whom 15% are homozygous in terms of CAGn length (27), 31 of 77 Klinefelter patients (40%) had the same allele length. This can be explained by the cytogenetic origin of 47,XXY. Paternal meiosis I errors account for 50% of the cases; the rest derive from maternal meiosis I and II failure as well as postzygotic errors (4). Although a relation of paternal age to the origin of 47,XXY is probably nonexistent, maternal age has been associated with meiosis I errors (4); the prevalence of Klinefelter cases increases with maternal age (6). Because a maternal meiosis II error accounts for about 15% of all Klinefelter patients (4),

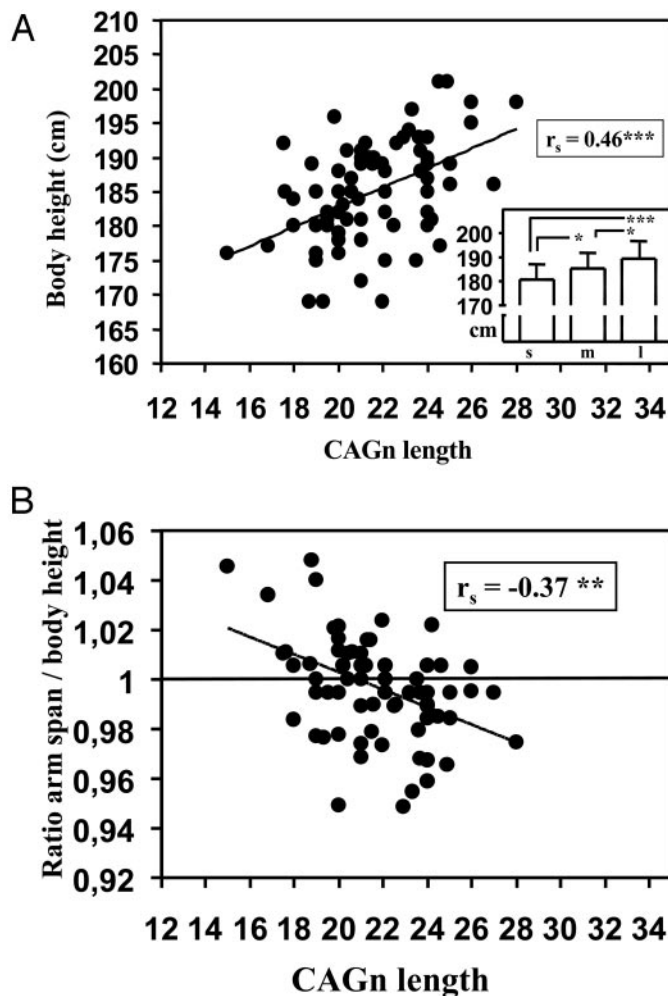

FIG. 2. A, Body height in relation to CAGn length of the AR genes of Klinefelter patients (X-weighted biallelic mean in heterozygous men, simple triplet length in homozygous men). Spearman's rank correlation is given as well as the regression line. *Inset*, Height distribution according to tertiles of X-weighted biallelic CAGn length [short: CAGn,  $\leq 20.0$  (n = 27); medium:  $20.0 < \text{CAGn}, \leq 23.0$  (n = 27); long: CAGn,  $> 23.0$  (n = 23)]. Significant differences according to Kruskal-Wallis and *post hoc* tests. Levels of statistical significance are given as asterisks (\*,  $P < 0.05$ ; \*\*,  $P < 0.001$ ; \*\*\*,  $P < 0.001$ ). B, The arm span/body height relation and CAGn length of the AR genes of Klinefelter patients (X-weighted biallelic mean in heterozygous men, simple triplet length in homozygous men). Spearman's rank correlation is given as well as the regression line. *Data points above the horizontal line* show patients with arm span longer than body height.

the higher number of homozygous men than women is explained by cloning of one maternal X-chromosome. In female mice, inactivation of the paternal X-chromosome during early embryonic stages is present, whereas a globalized inactivation pattern on a gene to gene basis occurs in later life (32). Preferential inactivation of paternal X-chromosomes could speculatively account for some of the variation in phenotypes; this aspect was not assessed here.

Forty-six of 77 men were heterozygous for the CAGn polymorphism of the AR gene. In these men, a nonrandom inactivation of AR alleles can be described with a preference of the longer allele to be more active. Preferential expression of longer AR alleles augments the effects discussed below. How

such a nonrandom inactivation, which has also been observed in women, is facilitated remains speculative (26–28). Some researchers suggested that other genes located on the X-chromosome affect inactivation, *e.g.* in the vicinity of Xq27 (33). It can also be speculated that the enzyme methyltransferase, which provides the methyl adducts to guanosine, will statistically inactivate higher proportions of a short CAGn sequence, compared with a long sequence, once it binds to the androgen receptor region. There are no data yet to confirm such a hypothesis.

Body height is increased in Klinefelter patients, with their mean height falling within the 75th percentile (4, 5). In general, tall stature is considered a typical feature of hypogonadism due to a retardation in the androgen-induced closure of epiphyses (2, 3). In agreement, we describe a strong association of height and bone density with the length of CAGn. Possibly, the clinically typical growth excess is augmented in those Klinefelter patients with longer repeats. Long-leggedness especially accounts for the increased body height of Klinefelter patients (34), a feature that cannot be reported here.

In contrast to body height, eunuchoid proportions with arm span exceeding body height are not generally seen in Klinefelter patients. Publications mention either no difference in arm span to body height or relatively long or relatively short arms (2, 3, 34, 35). On the average, arm span equaled body height in our patients. Nevertheless, those men with short CAGn had a longer arm span in relation to body height, whereas the opposite effect was seen in men with longer repeats. Our results point toward a positive association of androgens or androgen activity with the relation arm span/body height. Corresponding observations were made in adolescent boys compared with girls or Africans compared with Asians (36, 37); Africans have, on the average, three or four fewer CAGn than Asians (10). Hence, both androgen concentrations as well as genetically determined androgen activity seem to have an impact on body proportions.

Gynecomastia was present in half the patients, in agreement with other observations (2–4, 6). Especially those men with longer CAGn exhibited gynecomastia. Correspondingly, intrinsic androgen activity exerted by the AR polymorphism as well as T and estradiol concentrations influenced the presence of gynecomastia in multiple binomial regression models. Accordingly, in patients with X-SBMA, gynecomastia is a common clinical feature (13, 14).

We describe a marked influence of CAGn length on the social status of Klinefelter patients; men with higher androgenic activity (shorter CAGn) were more likely to live with a partner and present because of fertility problems than because of endocrine disorders. It has to be remarked that profound disturbances of spermatogenesis occur in all Klinefelter patients due to meiotic problems. Only those men sufficiently virilized to find a partner will then present with the desire for paternity (8). Those subjects with short CAGn were also more likely to work in highly skilled professions. The latter result has to be regarded with some caution, because the number of men with university degrees was low. Nevertheless, the finding is corroborated by an analysis involving relative shifts to professions of fathers and brothers;

FIG. 3. Distribution of categorical parameters according to tertiles of X-weighted biallelic CAGn length [short: CAGn,  $\leq 20.0$  ( $n = 27$ ); medium:  $20.0 < \text{CAGn} \leq 23.0$  ( $n = 27$ ); long: CAGn,  $> 23.0$  ( $n = 23$ )]. A, Gynecomastia; B, partnership; C, reason for referral; D, profession. *Upper part*, Raw data on professional categorization; *lower part*, relative difference in patient professional categorization score to the score of the father (○) or brother(s) (●;  $n = 18, 16$ , or  $13$  respective to tertile of CAGn length; in case of more than one brother, the mean of brother scores was considered). Scoring system (raw scores: no learned profession = 0, craftsman = 1, university degree = 2); the score of the Klinefelter patient (KSc) minus the score of the father (FSc) or brother (BSc) results in the relative difference. Example: Klinefelter patient is craftsman (KSc = 1), father is professor of economics (FSc = 2), relative score (RSc) = KSc - FSc = -1. Maintenance of family educational level results in RSc = 0, an improvement of the Klinefelter patient over the family level in RSc  $> 0$ , a deterioration in RSc  $< 0$ , the scale ranges from -2 to 2 and is ordinal. Given are mean and 95% confidence intervals; the dotted line indicates maintenance of social status in relation to fathers or brothers. Data for mothers or sisters are not reported, because gender-specific differences could create bias and confound results. Significance levels demonstrate a dependence of the respective parameter on CAGn length according to Somer's D test with CAGn as independent variable or, in the case of score comparison with father/brother, nonparametric Kruskal-Wallis and *post hoc* tests and are given as asterisks (\*,  $P < 0.05$ , \*\*,  $P < 0.01$ ; \*\*\*,  $P < 0.001$ ).

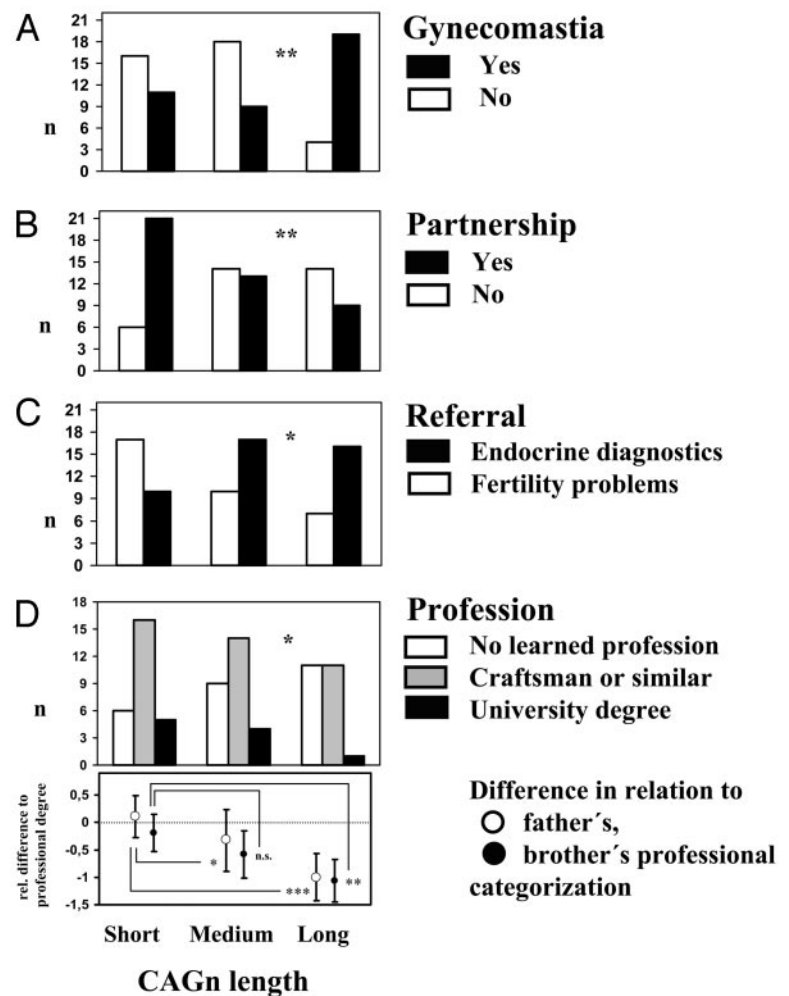

especially those Klinefelter patients with long X-weighted biallelic means of CAGn length tended to achieve educational qualifications below their family level. Particularly those Klinefelter patients who are markedly taller than their brothers might be affected by educational underachievement. Because data on the body height of brothers are not available in this study, this remains speculative. The results confirm previous findings and explain the marked variety found in Klinefelter patients, who, as individuals, generally fall within the normal range of mental abilities, but lower than that of euploid siblings (38). An increased risk for difficulties in social interaction is reported; the phenomenon seems to relate to limited expressive vocabulary skills and restrictions in language processing (38–40).

The AR polymorphism is associated with characteristics that are subject to slow or no change once they are determined: height, arm span, bone density, profession, gynecomastia, and partnership. Consideration of the CAGn polymorphism obviously allows a view into the androgenic past of Klinefelter patients, a time when these parameters were determined in an environment of sufficient androgen concentrations and are conserved in a *status quo ante*. One may speculate that in an environment of slowly decreasing androgen levels, those men with short CAGn maintain andro-

genicity for a longer time. This may merely be the crucial years during which the course is set for later life. At clinical diagnosis, however, 65% of the men were hypogonadal and without current sufficiency of AR activation, and the effects of the AR polymorphism were not visible; the more volatile parameters (*e.g.* hemoglobin, prostate size, body weight, body mass index, and hair pattern) were dependent on T levels or the estradiol/T ratio. Bone density may be seen as an intermediate parameter; it was dependent on both CAGn length and T levels. Nevertheless, when patients received T substitution, the effect of the AR polymorphism to modulate androgen action emerged as various degrees of LH suppression, elevated hemoglobin levels, or increased prostate growth (24).

The discrepancy of normal T levels and elevated LH concentrations, which is often found in Klinefelter patients, has not been resolved. One explanation is a Leydig cell dysfunction resulting in compensated hypergonadotropic hypogonadism; another hypothesis is that Klinefelter patients are moderately androgen insensitive. This study supports the latter concept, especially with the pharmacogenetic data on LH suppression. Nevertheless, both physiological explanations could be simultaneously present.

One can assume that the androgenic difference due to T



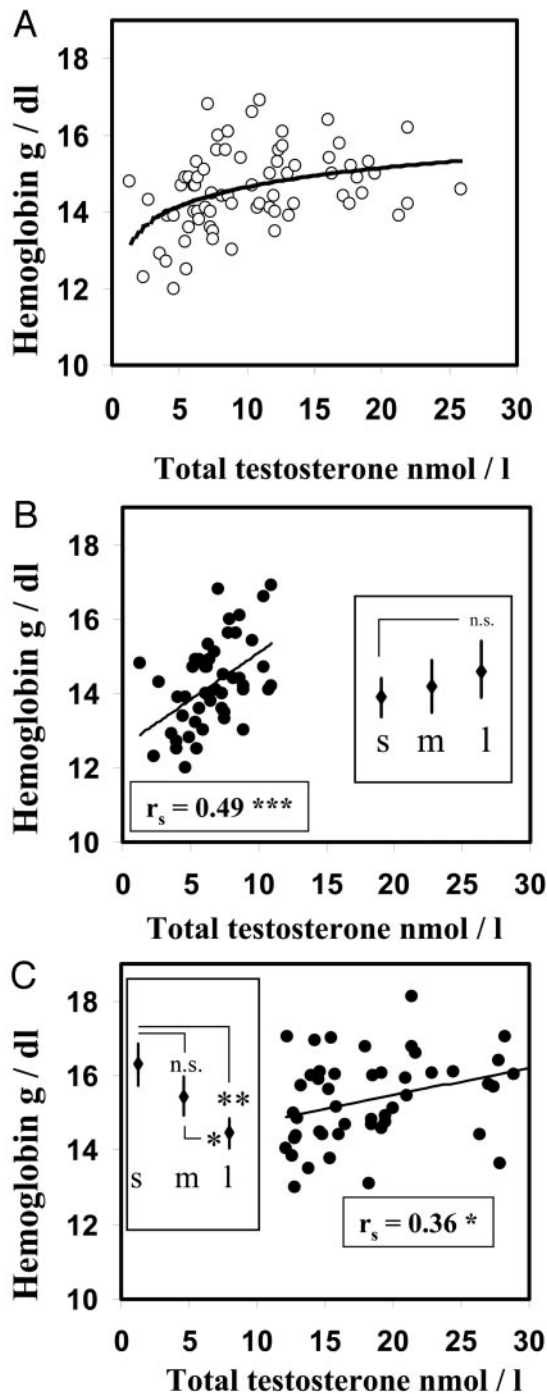

FIG. 4. A, Relation of total T concentrations to hemoglobin concentrations in all 77 Klinefelter patients. The association is log-linear [ $y = 0.7 \times \ln(x) + 12.9$ ], and its fit is superior to a linear regression (by F test,  $P = 0.01$ ). B, Relation of total T to hemoglobin levels in the 48 hypogonadal Klinefelter patients, who were, at this time point, not yet receiving T substitution therapy. Spearman's rank correlation is given as well as the regression line. C, The similar association, but during T substitution therapy. *Insets*, Distribution of hemoglobin levels according to tertiles of X-weighted biallelic CAGn length in the hypogonadal men who were treated [short: CAGn,  $\leq 20.0$  ( $n = 17$ ); medium:  $20.0 < \text{CAGn} \leq 23.0$  ( $n = 16$ ); long: CAGn,  $> 23.0$  ( $n = 15$ )]. The mean and 95% confidence intervals are given; the y-axis of the diagram applies. Significant differences according to Kruskal-Wallis and *post hoc* tests are indicated. Levels of statistical significance are

levels is mainly observed when hypogonadal men are compared with eugonadal men. Once sufficient androgen levels are reached, the CAGn polymorphism gains influence on androgen effects, whereas the actual T levels only account for smaller differences (see Table 3, prostate volume and LH levels under treatment).

From our results, it becomes clear that especially those Klinefelter patients with a long X-weighted biallelic mean of CAG repeats tend to encounter problems in life, such as professional underachievement as well as difficulties in finding a partner. Health issues are also affected, *e.g.* bone density is lower in these men. In general, life expectancy seems to be decreased in Klinefelter patients, but whether this is due to hypogonadism *per se* or socioeconomic factors has not been resolved (41). Although especially those Klinefelter patients with longer CAG repeats tend to be diagnosed earlier in life due to their more noticeable phenotype (see above), it might still be too late for these individuals to take countermeasures (*i.e.* T treatment or special education programs; the efficacy of which to improve social factors has yet to be demonstrated). This means that especially tall young boys with gynecomastia and learning disorders should be presented for endocrinological/andrological diagnosis. Although the Klinefelter syndrome is well known and will hardly be overlooked by specialists, there is a discrepancy between the high incidence of this most common form of male hypogonadism and the low number of specialized physicians. It is important to deliver information concerning Klinefelter syndrome to physicians working in other fields and in general practice so that the general awareness of this health problem will be increased. Reviews in journals with a wide, general spectrum of readers will be most helpful in this effort (42).

The CAG repeat polymorphism of the AR gene in conjunction with X-chromosome inactivation patterns can explain variations in phenotype and social traits of Klinefelter patients. Although this is scientifically fascinating, the practical clinical value of our data lies with the pharmacogenetic modulation of T treatment.

In conclusion, significant modulation of androgen effects on the phenotype of Klinefelter patients is exerted via the CAGn polymorphism of the AR gene, especially during those phases of life in which sufficient androgen levels and, hence, AR activation can be assumed. This modulation is magnified by preferential inactivation of the more functional short CAGn allele. The study supports efforts of early identification and T treatment of Klinefelter adolescents (4, 6) to override symptoms of hypogonadism (42). This approach may be especially indicated in those boys with an X-weighted biallelic mean above 23 CAGn to help them to achieve sufficient androgenicity during a pivotal time period to set the course for a normal male life within the intrinsic settings of their family. This study also yields important information with regard to pharmacogenetic surveillance of patients, *e.g.* concerning prostate growth during T substitution therapy; those patients with shorter CAGn may need closer monitoring and possibly less T.

given as asterisks (\*,  $P < 0.05$ ; \*\*,  $P < 0.001$ ; \*\*\*,  $P < 0.001$ ). Note that the association of hemoglobin levels to T concentrations is less pronounced in the eugonadal than in the hypogonadal range, but that CAGn length is only related to hemoglobin concentrations when T levels are within the normal range.

## Acknowledgments

We thank Susan Nieschlag, M.A., for language editing, and Lisa Pekel for excellent technical assistance. The karyotyping was performed at the Institute of Human Genetics, University of Munster (Director Prof. Dr. J. Horst).

Received July 20, 2004. Accepted September 7, 2004.

Address all correspondence and requests for reprints to: Dr. E. Nieschlag, Institute of Reproductive Medicine, University of Munster, Domagkstrasse 11, D-48129 Munster, Germany. E-mail: nieschl@uni-muenster.de.

## References

- Klinefelter HF, Reifenstein EC, Albright F 1942 Syndrome characterized by gynecomastia, aspermatogenesis without Leydigism, increased excretion of follicle hormone stimulating hormone. *J Clin Endocrinol* 2:615–627
- Nieschlag E, Behre HM, Meschede D, Kamischke A 2000 Disorders at the testicular level. In: Nieschlag E, Behre HM, eds. *Andrology: male reproductive health and dysfunction*. 2nd ed. Heidelberg, Berlin: Springer; 133–162
- Griffin JE, Wilson JD 2002 Disorders of the testes and the male reproductive tract. In: Larsen PR, Kronenberg HM, Melmed S, Polonsky KS, eds. *Williams textbook of endocrinology*. 10th ed. Philadelphia: Saunders; 709–770
- Simpson JL, de la Cruz F, Swerdloff RS, Samango-Sprouse C, Skakkebaek NE, Graham Jr JM, Hassold T, Aylstock M, Meyer-Bahlburg HF, Willard HF, Hall JG, Salameh W, Boone K, Staessen C, Geschwind D, Giedd J, Dobs AS, Rogol A, Brinton B, Paulsen CA 2003 Klinefelter syndrome: expanding the phenotype and identifying new research directions. *Genet Med* 5:460–468
- Kamischke A, Baumgardt A, Horst J, Nieschlag E 2003 Clinical and diagnostic features of patients with suspected Klinefelter syndrome. *J Androl* 24:41–48
- Bojesen A, Juul S, Gravholt CH 2003 Prenatal and postnatal prevalence of Klinefelter syndrome: a national registry study. *J Clin Endocrinol Metab* 88:622–626
- Abramsky L, Chapple J 1997 47,XXY (Klinefelter syndrome) and 47,XXY: estimated rates of and indication for postnatal diagnosis with implications for prenatal counselling. *Prenat Diagn* 17:363–368
- Vernaev V, Staessen C, Verheyen G, Van Steirteghem A, Devroey P, Tournaye H 2004 Can biological or clinical parameters predict testicular sperm recovery in 47,XXY Klinefelter's syndrome patients? *Hum Reprod* 19:1135–1139
- Choong CS, Wilson EM 1998 Trinucleotide repeats in the human androgen receptor: a molecular basis for disease. *J Mol Endocrinol* 21:235–257
- Zitzmann M, Nieschlag E 2003 The CAG repeat polymorphism within the androgen receptor gene and maleness. *Int J Androl* 26:76–83
- La Spada AR, Wilson EM, Lubahn DB, Harding AE, Fischbeck KH 1991 Androgen receptor gene mutations in X-linked spinal and bulbar muscular atrophy. *Nature* 352:77–79
- Beilin J, Ball EM, Favaloro JM, Zajac JD 2000 Effect of the androgen receptor CAG repeat polymorphism on transcriptional activity: specificity in prostate and non-prostate cell lines. *J Mol Endocrinol* 25:85–96
- Kennedy WR, Alter M, Sung JH 1968 Progressive proximal spinal and bulbar muscular atrophy of late onset. *Neurology* 18:671–680
- Dejager S, Bry-Gaillard H, Bruckert E, Eymard B, Salachas F, LeGuern E, Tardieu S, Chadarevian R, Giral P, Turpin G 2002 A comprehensive endocrine description of Kennedy's disease revealing androgen insensitivity linked to CAG repeat length. *J Clin Endocrinol Metab* 87:3893–3901
- Giovannucci E, Stampfer MJ, Chan A, Krithivas K, Gann PH, Hennekens CH, Kantoff PW 1999 CAG repeat within the androgen receptor gene and incidence of surgery for benign prostatic hyperplasia in U.S. physicians. *Prostate* 39:130–134
- Zitzmann M, Gromoll J, von Eckardstein A, Nieschlag E 2003 The CAG repeat polymorphism in the androgen receptor gene modulates body fat mass and serum levels of leptin and insulin in men. *Diabetologia* 46:31–39
- Zitzmann M, Brune M, Kornmann B, Gromoll J, von Eckardstein S, von Eckardstein A, Nieschlag E 2001 The CAG repeat polymorphism in the AR gene affects high density lipoprotein cholesterol and arterial vasoreactivity. *J Clin Endocrinol Metab* 86:4867–4873
- Zitzmann M, Brune M, Kornmann B, Gromoll J, Junker R, Nieschlag E 2001 The CAG repeat polymorphism in the androgen receptor gene affects bone density and bone metabolism in healthy males. *Clin Endocrinol (Oxf)* 55:649–657
- Chen HY, Chen WC, Wu MC, Tsai FJ, Tsai CH 2003 Androgen receptor (AR) gene microsatellite polymorphism in postmenopausal women: correlation to bone mineral density and susceptibility to osteoporosis. *Eur J Obstet Gynecol Reprod Biol* 26;107:52–56
- Seidman SN, Araujo AB, Roose SP, McKinlay JB 2001 Testosterone level androgen receptor polymorphism and depressive symptoms in middle-aged men. *Biol Psychol* 50:371–376
- Harkonen K, Huhtaniemi I, Makinen J, Hubler D, Irjala K, Koskenvuo M, Oettel M, Raitakari O, Saad F, Pollanen P 2003 The polymorphic androgen receptor gene CAG repeat pituitary-testicular function and andropausal symptoms in ageing men. *Int J Androl* 26:187–194
- Von Eckardstein S, Syska A, Gromoll J, Kamischke A, Simoni M, Nieschlag E 2001 Inverse correlation between sperm concentration and number of androgen receptor CAG repeats in normal men. *J Clin Endocrinol Metab* 86:2585–2590
- Ntais C, Polycarpou A, Tsatsoulis A 2003 Molecular epidemiology of prostate cancer: androgens and polymorphisms in androgen-related genes. *Eur J Endocrinol* 149:469–477
- Zitzmann M, Depenbusch M, Gromoll J, Nieschlag E 2003 Prostate volume and growth in testosterone-substituted hypogonadal men are dependent on the CAG repeat polymorphism of the androgen receptor gene: a longitudinal pharmacogenetic study. *J Clin Endocrinol Metab* 88:2049–2054
- Lyon MF 2002 X-chromosome inactivation and human genetic disease. *Acta Paediatr Suppl* 91:107–112
- Calvo RM, Asuncion M, Sancho J, San Millan JL, Escobar-Morreale HF 2000 The role of the CAG repeat polymorphism in the androgen receptor gene and of skewed X-chromosome inactivation, in the pathogenesis of hirsutism. *J Clin Endocrinol Metab* 85:1735–1740
- Hickey T, Chandy A, Norman RJ 2002 The androgen receptor CAG repeat polymorphism and X-chromosome inactivation in Australian Caucasian women with infertility related to polycystic ovary syndrome. *J Clin Endocrinol Metab* 87:161–165
- Volterro A, Stratakis CA, Ghizzoni L, Longui CA, Karl M, Chrousos GP 1999 Androgen receptor-mediated hypersensitivity to androgens in women with nonhyperandrogenic hirsutism: skewing of X-chromosome inactivation. *J Clin Endocrinol Metab* 84:1091–1095
- Iitsuka Y, Bock A, Nguyen DD, Samango-Sprouse CA, Simpson JL, Bischoff FZ 2001 Evidence of skewed X-chromosome inactivation in 47,XXY and 48,XXYY Klinefelter patients. *Am J Med Genet* 98:25–31
- World Health Organization 1999 WHO laboratory manual for the examination of human semen and sperm-cervical mucus interaction. 4th ed. Cambridge, UK: Cambridge University Press
- Zitzmann M, Brune M, Vieth V, Nieschlag E 2002 Monitoring bone density in hypogonadal men by quantitative phalangeal ultrasound. *Bone* 31:422–429
- Huynh KD, Lee JT 2003 Inheritance of a pre-inactivated paternal X chromosome in early mouse embryos. *Nature* 426:857–862
- Naumova AK, Plenge RM, Bird LM, Leppert M, Morgan K, Willard HF, Sapienza C 1996 Heritability of X chromosome-inactivation phenotype in a large family. *Am J Hum Genet* 58:1111–1119
- Varrela J 1984 Effects of X chromosome on size and shape of body: an anthropometric investigation in 47,XXY males. *Am J Phys Anthropol* 64:233–242
- Visotsak J, Aylstock M, Graham Jr JM 2001 Klinefelter syndrome and its variants: an update and review for the primary pediatrician. *Clin Pediatr (Phila)* 40:639–651
- Engstrom FM, Roche AF, Mukherjee D 1981 Differences between arm span and stature in white children. *J Adolesc Health Care* 2:19–22
- Reeves SL, Varakamin C, Henry CJ 1996 The relationship between arm-span measurement and height with special reference to gender and ethnicity. *Eur J Clin Nutr* 50:398–400
- Bender BG, Linden MG, Harmon RJ 2001 Life adaptation in 35 adults with sex chromosome abnormalities. *Genet Med* 3:187–191
- Boone KB, Swerdloff RS, Miller BL, Geschwind DH, Razani J, Lee A, Gonzalo IG, Haddad A, Rankin K, Lu P, Paul L 2001 Neuropsychological profiles of adults with Klinefelter syndrome. *J Int Neuropsychol Soc* 7:446–456
- Graham Jr JM, Bashir AS, Stark RE, Silbert A, Walzer S 1988 Oral and written language abilities of XXY boys: implications for anticipatory guidance. *Pediatrics* 81:795–806
- Bojesen A, Juul S, Birkebaek N, Gravholt CH 2004 Increased mortality in Klinefelter syndrome. *J Clin Endocrinol Metab* 89:3830–3834
- Lanfranco F, Kamischke A, Zitzmann M, Nieschlag E 2004 Klinefelter's syndrome. *Lancet* 364:273–283
